# Supplementary material for: Correlation between investment in sexual traits and valve sexual dimorphism in Cyprideis species (Ostracoda)
Source: PLoS One. 2017 Jul 5;12(7):e0177791. doi: 10.1371/journal.pone.0177791 (PMC5497955; doi:10.1371/journal.pone.0177791)
Supplement: S2 Table — (XLSX) [file pone.0177791.s003.xlsx]

## Sheet: Cyprideis
ID	Species	sex	RValveArea	RMaj	RMin	LValveArea	LMaj	LMin	L1A	R1A	L2A	R2A	L3WL	R3WL	LMd	RMd	L1-2.HemiBC	L3-4.HemiBC	LHemiBCd.length	R1-2.HemiBC	R3-4.HemiBC	RHemiBCd.length	L_TEArea	R_TEArea	L_TELength	R_TELength	L_WL1width.prox	L_WL1curve.length	R_WL1width.prox	R_WL1curve.length	Llinear1WL	Rlinear1WL	Left Vs Right.undef	USNM/site code	Collection lot name	date collection	Location	country
MEXI_M#01	MEXI	M	326495	455.616	229.939	351630	466.12	241.78	119.882	121.148	125.393	123.716	131.472	134.873	257.025	260.359	175.694	202.924	383.702	176.868	208.08	387.387	18376.3	19174.7	108.06	107.043			36.7197	73.4861		65.037		128389	Cyprideis bensoni	1960	Redfish Bay, Texas	USA
MEXI_M#02	MEXI	M	352147	477.713	236.845	380317	483.059	252.373	127.171	127.611		125.078	135.041		269.731	267.942				163.838	214.364	393.142	19020.2		99.8125		21.4979	56.4136	32.239	59.7841		56.8528	Hemi	128389	Cyprideis bensoni	1960	Redfish Bay, Texas	USA
MEXI_M#03	MEXI	M	294514	428.857	220.903	323924	440.845	235.529	114.188	113.888	121.457	122.639	132.028		245.232	244.345	155.434	187.07		156.693	186.53				101.993	99.9454			26.2343	55.213		50.8579	3WL	128389	Cyprideis bensoni	1960	Redfish Bay, Texas	USA
MEXI_M#04	MEXI	M	322425	455.004	227.847	349823	462.402	242.481					141.976		258.303	247.691				175.555	201.689				101.785	101.974							3WL	128389	Cyprideis bensoni	1960	Redfish Bay, Texas	USA
MEXI_M#05	MEXI	M	309173	443.16	224.241	342743	455.603	241.432	117.205			130.824	131.297	132.614	257.002	247.957	163.085	189.424		161.833	192.539		17570.3	17821.1	104.239	104.403	23.4929	51.6227			50.2853			128389	Cyprideis bensoni	1960	Redfish Bay, Texas	USA
MEXI_F#07	MEXI	F	341366	447.665	244.177	371818	457.219	259.882	117.661	113.265	122.309		133.514		266.093	261.999																	1A,2A,3WL,Md	128369	Cyprideis bensoni	1960	Copano Bay, Texas	USA
MEXI_F#08	MEXI	F	331488	441.461	240.406	364986	451.6	258.008	117.291	115.79	130.382	126.907	134.53	145.195	264.465	259.204											19.4123	47.7432	21.9849	53.3369	46.9643	52.1626	3WL,1WL	128369	Cyprideis bensoni	1960	Copano Bay, Texas	USA
MEXI_F#09	MEXI	F	336936	446.777	241.359	375336	455.247	263.319	116.3			117.979	138.804		269.115	259.036																	3WL	128369	Cyprideis bensoni	1960	Copano Bay, Texas	USA
MEXI_F#10	MEXI	F	320607	433.63	236.518	361601	447.331	258.083	115.08	118.756	119.055	118.931	135.807	135.567	266.145	260.662											23.3033		20.6013	51.0202		49.6231	3WL,1WL	128369	Cyprideis bensoni	1960	Copano Bay, Texas	USA
MEXI_F#11	MEXI	F	331607	437.63	242.362	367606	451.54	260.057	110.734	117.735	117.546	116.61	138.6	137.116	257.294	258.234											20.8088	50.2266	20.619	48.0288	49.3746	47.4622	3WL,1WL	128369	Cyprideis bensoni	1960	Copano Bay, Texas	USA
MEXI_F#12	MEXI	F	342670	455.396	241.139	383415	468.853	261.361	121.45	117.449	131.697	131.231	144.087	145.508		258.16											23.0877	54.7441	21.7072	54.9066	52.7382	51.9052	3WL,1WL	128369	Cyprideis bensoni	1960	Copano Bay, Texas	USA
MEXI_F#13	MEXI	F	341507	449.391	243.322	376645	457.2	263.08	116.658	116.864	128.937	125.298	143.478	138.444	260.274	263.525											22.2338	52.474		50.0597	51.5615	48.6659	2A,3WL,1WL	128369	Cyprideis bensoni	1960	Copano Bay, Texas	USA
MEXI_F#15	MEXI	F	333214	440.828	241.962	369046	448.92	262.504	118.879	119.351	119.575	120.189	135.278	136.469	260.612	258.521											19.0147	48.7335	19.3964	45.6829	48.0029	44.9107		128369	Cyprideis bensoni	1960	Copano Bay, Texas	USA
MEXI_F#16	MEXI	F	349445	454.261	246.311	382543	461.976	264.413	114.89	114.21	122.259	118.018	143.874	142.3	265.313	262.882													21.2045	51.9227		50.526		128369	Cyprideis bensoni	1960	Copano Bay, Texas	USA
MEXI_F#17	MEXI	F	321802	435.587	236.41	360913	448.164	257.297	113.535	117.248					258.346	264.134																		128369	Cyprideis bensoni	1960	Copano Bay, Texas	USA
MEXI_F#18	MEXI	F	335844	443.481	242.511	366670	449.585	260.535	116.136	118.353	123.077	122.789	138.2		268.091	264.569											21.9081	50.3867	18.4571	49.793	48.7927	48.6035	3WL,1WL	128369	Cyprideis bensoni	1960	Copano Bay, Texas	USA
MEXI_F#19	MEXI	F	339209	446.927	242.758	375981	456.163	263.083	115.728	117.703	120.519	122.546	139.292	142.721	265.98	264.542											21.1581	50.5164	21.567	50.8221	49.3899	49.4416	3WL,1WL	128369	Cyprideis bensoni	1960	Copano Bay, Texas	USA
MEXI_M#07	MEXI	M	322859	454.863	228.114	348451	462.802	241.438		118.026			137.46	140.744	256.095	257.996	173.962	204.151	398.486	201.133		393.086	21110	21746.7	104.786	107.248	29.098	61.9514	37.0092	78.6265	60.4578	70.92		128367	Cyprideis sp.	1960	Texas	USA
MEXI_M#08	MEXI	M	346973	468.303	238.26	371335	480.852	248.047	127.842	123.631	133.75	136.137	142.157	145.647		277.2	181.656	220.183	414.728	173.227	227.463	412.138	21498.4	22371.8	107.141	107.648	27.656	62.6978	42.2964	82.7684	59.8189	74.0199		128367	Cyprideis sp.	1960	Texas	USA
MEXI_M#09	MEXI	M	366320	481.79	244.314	388816	489.03	255.02	128.434	127.577	135.166	142.95	148.478		285.507	282.684	193.007	225.155	439.521	195.834	222.12	444.152	24380.8	22480.7	110.43	109.276			43.0401	75.4637		69.3746		128367	Cyprideis sp.	1960	Texas	USA
MEXI_M#10	MEXI	M	325594	461.134	227.17	348401	469.295	238.439	117.039	120.62	138.619	139.401	142.447	141.061	267.066		178.558	214.597	409.401	183.055	212.891	410.632	23807.5	23148.6	113.186	111.584	25.9112	64.0185	35.2079	71.5489	62.1433	64.7188		128367	Cyprideis sp.	1960	Texas	USA
MEXI_M#11	MEXI	M	363362	482.06	242.382				123.444	121.063	135.922	130.657	143.101	144.963	270.894	265.268	163.386	229.393	412.92	181.579	217.558	420.065	23372	21950.1	114.482	108.756	25.1466	62.8098	31.3719	57.1798	60.6739	54.3604		128367	Cyprideis sp.	1960	Texas	USA
MEXI_M#12	MEXI	M	359056	478.58	241.436	391774	493.339	254.738	115.571	119.681	135.409	139.426	150.046	149.579	277.53	271.802	199.394	201.991	420.448	190.162	216.628	412.333	22664.7	23575	114.003	111.829	28.5002	69.5489	36.4271	68.5555	66.8512	62.4611		128367	Cyprideis sp.	1960	Texas	USA
MEXI_M#13	MEXI	M	380038	495.453	246.556	416876	508.901	262.844	122.107		143.813	144.84	145.659	147.58	283.829	279.951	207.854			177.712	221.782		18645.8	19353.3	107.097	113.845	27.8745	67.6321	36.3971	82.0311	65.9972	73.408	1A,2A,3WL	128367	Cyprideis sp.	1960	Texas	USA
MEXI_M#14	MEXI	M	374045	490.232	245.149	407181	501.905	260.248	120.172	123.235	143.47	141.935	148.687	150.44	283.851	276.843	191.755	213.558	430.624	195.564	216.744	450.671	21460.9		112.913	111.095	24.7957	59.5905	33.6749	71.4548	58.0805	64.1115		128367	Cyprideis sp.	1960	Texas	USA
MEXI_M#15	MEXI	M	358889	482.694	239.272	393348	498.069	253.796	122.403	119.914	132.323	134.124	144.208	147.683	268.39	267.562	183.305		433.677	183.411	223.414	432.6	19978.2	21086.2	110.937	107.998	25.248	57.709	35.4305	78.5943	56.0303	69.4992		128367	Cyprideis sp.	1960	Texas	USA
MEXI_M#16	MEXI	M	365438	485.831	241.796	394754	494.899	256.059	120.427	122.391	143.531	143.679	143.5	146.34	275.972	273.93	186.315	210.201	423.278	181.516	205.302	434.477	19580.9	21251.2	111.65	109.506	26.8344	61.9041	29.069		60.0527			128367	Cyprideis sp.	1960	Texas	USA
SALE_F#00	SALE	F				654495	584.384	357.997	152.288	152.325	184.292	184.459	191.347	180.562	318.059	315.152											23.3815	73.3688	22.0423	73.3649	72.9998	73.1348	1A,2A,3WL,Md,1WL	IMON 2.15			chesapeake bay	USA
SALE_F#c	SALE	F	628280	581.802	345.408	671314	587.789	364.922	158.088	154.319	181.997	184.039	186.021	185.705	310.009	311.139											24.5761	74.7093	26.5451	76.8191	74.3232	76.3585		IMON 2.15			chesapeake bay	USA
SALE_F#d	SALE	F	650925	592.119	351.515	708543	601.338	376.305	160.485	157.462	190.055	187.237	193.699	194.609													24.3223	82.8819	23.9944	79.289	82.5196	78.8683		IMON 2.15			chesapeake bay	USA
SALE_F#e	SALE	F	590275	568.504	332.173	633416	572.315	353.534	151.541	149.979	174.18	178.847	175.647	176.02		297.168											24.1694	76.5879	23.7533	76.4171	75.6034	75.8611		IMON 2.15			chesapeake bay	USA
SALE_F#f	SALE	F	591221	568.061	333.115	641469	577.969	354.443	159.894	153.872	187.942	181.393	190.824	188.878	319.351												23.106	78.3681	23.1291	78.9642	77.9312	78.4398		IMON 2.15			chesapeake bay	USA
SALE_F#g	SALE	F	641640	590.625	347.99	687695	599.931	366.398	154.608	154.867	185.815	186.347	193.351	190.714		308.939											24.1426	78.6129	23.9874	79.07	77.9438	77.6333		IMON 2.15			chesapeake bay	USA
SALE_F#h	SALE	F	648810	592.256	350.653	699507	595.954	375.011	160.138	158.887	189.637	185.872	193.393	190.932	322.208												23.3225	79.7818	24.1193	76.7491	79.4208	76.0803		IMON 2.15			chesapeake bay	USA
SALE_F#i	SALE	F	645796	591.942	348.882	689535	596.556	369.466	154.743	154.505	188.836	186.389	186.614	183.577		318.415											24.8398	84.415	25.9317	80.7957	83.2515	78.6387		IMON 2.15			chesapeake bay	USA
SALE_F#j	SALE	F	588073	560.137	336.07	633185	570.731	354.596	149.301	148.694	179.905	182.472	187.751	182.206	307.296	307.01											23.0085	77.0677	19.7735	74.9375	76.6449	74.7212		IMON 2.15			chesapeake bay	USA
SALE_F#k	SALE	F	614240	580.58	338.82	666600	586.417	363.47	157.984	156.769	189.97	190.299	184.802	178.579	319.603												20.145	73.521	24.7776	78.1383	73.1812	76.8059	Md	IMON 2.15			chesapeake bay	USA
SALE_F#L	SALE	F	621141	579.86	342.896	663172	585.347	362.11	153.144	154.28	184.829	184.097	189.069	188.247	311.673																			IMON 2.15			chesapeake bay	USA
SALE_F#M	SALE	F	615318	568.304	346.364	652760	576.965	361.432	154.387		179.302	184.533	191.406		314.972																		1A,2A,3WL,Md	IMON 1.66			chesapeake bay	USA
SALE_F#N	SALE	F	574638	555.845	331.326	617733	566.443	348.687		146.957	182.283	183.398	176.289	176.54	301.718	303.44											21.8773	75.5536	22.1643	69.4564	75.4963	69.1508		IMON 1.66			chesapeake bay	USA
SALE_F#O	SALE	F	613863	578.599	339.742	652635	581.048	358.892	149.591	148.737	178.719	182.192	183.06	182.999		307.917											23.5407	77.2302	22.6976	79.0057	75.4033	76.8881		IMON 1.66			chesapeake bay	USA
SALE_F#P	SALE	F	610469	575.674	339.486	646347	578.231	357.308	149.594	150.069	185.806	190.561	180.679	188.247		322.413											24.5978	80.0129	23.8571	76.6529	79.6718	76.3894		IMON 1.66			chesapeake bay	USA
SALE_F#Q	SALE	F	613847	569.914	344.656	653501	573.675	363.677	146.706	149.34	190.258	181.568	181.54	185.642	311.293												22.0321	77.6627	20.8142	75.8186	77.5885	75.6145		IMON 1.66			chesapeake bay	USA
SALE_F#R	SALE	F	634803	588.99	345.241	665835	592.685	359.021	150.356	152.927	181.106	186.555	188.907	189.371	314.769												22.515	76.2743	21.8888	83.1068	75.4736	81.8642		IMON 0.13			chesapeake bay	USA
SALE_F#S	SALE	F	577696	558.463	331.052	609226	559.568	347.979	143.953		176.775		177.297	176.135	305.809												21.4351	76.6505	21.7537	75.918	74.9797	75.1294		IMON 0.13			chesapeake bay	USA
SALE_M#04	SALE	M	648572	624.844	332.751	692222	627.225	353.063	163.832		199.168	195.488	192.259	191.514	322.39	314.135	243.764	306.219	553.773	252.27	306.599				204.009	188.257	26.5027	103.478	38.2011	115.101	101.995	103.956	1A,2A,Md,Hemi	IMON 2.15			chesapeake bay	USA
SALE_M#06	SALE	M	630109	618.706	326.626	673958	624.021	345.659	154.238		188.39	191.165	185.285	184.708	320.892		261.612	287.33	533.493	244.162	306.362	537.66	85392.2	81226.1	185.519	177.025	24.124	86.5747	41.253	115.629	86.3259	104.464	1A,2A,Md	IMON 2.15			chesapeake bay	USA
SALE_M#07	SALE	M	662471	632.381	335.821	693286	635.327	349.369	160.771			201.155	190.057	189.492	318.397		250.066	306.911	573.507	250.763	313.01	579.689	85571.7	88213.3	178.695	196.527	27.492	100.195	35.0904	118.745	98.8088	108.173		IMON 2.15			chesapeake bay	USA
SALE_M#08	SALE	M	596839	603.207	317.461	641637	609.842	336.881	158.036		193.72	189.863	186.511	193.06	313.1	306.778	234.15	287.288		250.89	291.56		72301.1	72695.8	171.624	175.163	25.6574	96.1296	36.7419	113.189	94.6853	102.875		IMON 2.15			chesapeake bay	USA
SALE_M#09	SALE	M	634743	618.353	329.113	682936	622.635	350.836	157.752	155.018	191.749		188.802	179.914	330.227	324.751	245.277	309.547	531.526		318.363	531.182			178.532	191.175	26.8658	90.2517	39.7934	109.39	89.4253	100.215		IMON 2.15			chesapeake bay	USA
SALE_M#10	SALE	M	659093	630.022	335.643	700731	635.481	352.962	160.34	159.993	191.885	190.522		192.789		327.859		292.374	558.377	247.873	314.607	556.218	84225.1	85221.6	176.858	183.748	27.5349	103.211	40.9318	117.111	101.966	107.082		IMON 2.15			chesapeake bay	USA
SALE_M#11	SALE	M	664667	635.898	335.494	713376	641.916	355.969	158.762	159.558	201.941	197.462	189.534	183.674		314.416	245.744	297.162	566.971	243.244	307.557	574.484					28.7044	100.838	48.7028	135.017	100.036	126.92		IMON 2.15			chesapeake bay	USA
SALE_M#12	SALE	M	644392	620.834	332.939	686701	623.127	352.575	158.953	155.039	199.587	196.999	186.067	191.946	316.97		249.15	313.516	564.152	261.837	301.686	556.431			182.024		26.9076	105.521	39.8336	116.205	102.862	105.518		IMON 2.15			chesapeake bay	USA
SALE_M#13	SALE	M	664380	636.692	334.636	705209	641.474	351.763	159.533	158.973	194.089	194.482	196.662	192.904	328.982		260.392	307.012	555.812	262.201	310.904	577.168	84831.8	83201	182.106	185.828	27.5512	106.061	38.6775	120.951	104.514	108.191		IMON 2.15			chesapeake bay	USA
SALE_M#14	SALE	M	635872	616.6	330.561	685914	622.339	352.342		158.523	193.822	193.884	188.356			314.494	238.8	295.854	528.354	240.099	307.274	535.772			177.126	188.731	25.8754	101.333	38.8	117.714	100.386	106.313		IMON 2.15			chesapeake bay	USA
SALE_M#18	SALE	M	609223	607.059	321.727				158.746	152.057	188.492	180.806	185.196	183.943	313.838	308.547	243.578	307.087	540.289	249.138	305.833	533.822					24.4397	97.6378	35.1719	109.517	95.8878	101.951		IMON 2.15			chesapeake bay	USA
SALE_M#19	SALE	M	622146	612.127	326.014	671724	625.835	343.519	153.605	153.13	184.872	183.439	186.846	187.791	308.692	314.615	256.767	297.552	563.721	249.591	302.568	547.463					21.2112	95.7525	35.4273	111.559	95.1932	103.823	3WL	IMON 2.15			chesapeake bay	USA
SALE_M#20	SALE	M	643143	617.634	333.813	685080	621.434	352.606	157.427	156.183	195.174	188.049	190.8	191.665	324.825	314.076	250.304	304.918	541.558	264.136	321.599	550.063	86236.1	84708.9	177.073	193.497	27.3794	101.463	40.5817	113.937	99.5075	104.406		IMON 2.15			chesapeake bay	USA
SALE_M#21	SALE	M	636207	622.857	327.722	677584	630.509	344.037	159.248	159.35	194.955	193.396	190.877	190.237	312.931	312.709	248.147	309.564	561.055	251.727	308.665	556.997	88388.4	90640.4	180.099	185.458								IMON 2.15			chesapeake bay	USA
SALE_M#22	SALE	M	661210	629.219	336.922	706168	632.481	357.031	155.84	154.556			197.045	194.906	319.829	313.68	259.354	305.165	558.179	263.141	311.545	567.122					27.8422	101.029	38.631	117.348	99.9761	108.867	Hemi	IMON 2.15			chesapeake bay	USA
SALE_M#23	SALE	M	632816	621.124	326.749	681924	628.863	347.176	154.703	154.689	184.708	182.555	180.835	182.332	321.661		243.847	298.294	538.209	246.471	302.225	544.334		77175.5	182.035	188.886	24.8229	95.9958	36.1555	112.371	95.128	102.103	3WL,Md	IMON 2.15			chesapeake bay	USA
SALE_M#24	SALE	M	617867	606.683	326.487	665637	614.148	346.628	151.541	150.335	185.101	182.024	185.846	187.132			244.567	296.959	539.151	239.217	296.15	520.853		83655.9	178.341	193.057	25.5455	96.9595	36.991	115.329	94.9616	105.046		IMON 2.15			chesapeake bay	USA
SALE_M#25	SALE	M				669420	622.385	344.161	154.927	155.888	187.964	181.211	184.893	186.013	319.7	308.908	241.323	298.796	536.297	248.442	309.558	538.831	74686.9	72523.2	168.172	193.171	26.5821	91.5508	40.806	113.953	90.511	105.681	2A	IMON 2.15			chesapeake bay	USA
SALE_M#26	SALE	M	610452	608.194	321.967	660784	614.9	343.917	156.572	159.76	190.52	187.486	188.101	182.286	312.156		239.983	300.686	544.751	239.153	297.399	539.329	75933.4	75951.5	180.068	181.666	26.8187	91.4796	37.4805	116.527	89.3955	105.839		IMON 2.15			chesapeake bay	USA
SALE_M#27	SALE	M				673990	633.955	341.454	154.87	155.383	192.4	185.973	181.671	179.123	319.78	322.418	247.125	302.816	543.185	246.788	304.879	556.826	85186.3	84993.8	185.611	194.101	27.7654	95.3724	42.1867	115.388	93.9262	106.382		IMON 2.15			chesapeake bay	USA
SALE_M#28	SALE	M				639070	606.412	337.711	153.342	150.343	186.294	185.65	181.384	181.118	304.236		233.777	284.122	519.801	231.983	290.98	527.714	82327.1	83209.9	171.369	186.144	27.1342	95.6259	39.7178	114.446	92.972	103.058		IMON 2.15			chesapeake bay	USA
SALE_M#29	SALE	M				672442	620.995	346.378	154.371			183.217	180.846		309.061	307.323	247.669	294.926	561.624							188.282			38.7297	117.882		109.868		IMON 2.15			chesapeake bay	USA
SALE_M#30	SALE	M				697589	630.188	353.933	150.109	157.656	194.639	191.481	182.892	186.843	317.39		251.739	321.571	576.193	250.245	326.195				178.846		26.2482	101.936	36.9553	113.757	100.122	104.64	1A,2A,3WL,Md,Hemi	IMON 1.66			chesapeake bay	USA
SALE_M#31	SALE	M	627860	612.624	328.804	666149	617.848	344.975	150.497	146.597	188.851	189.024	181.21	181.471			247.276	314.488	544.037	245.641	308.752	546.47			187.792	180.144	24.8952	99.9038	33.8587	106.799	98.0642	100.407	1A,2A,3WL,Hemi	IMON 1.66			chesapeake bay	USA
SALE_M#32	SALE	M	628889	607.827	331.7	667384	618.299	345.575	153.814	157.166	182.141	181.188	187.377	186.966	325.714	312.819	251.923	306.151	540.745	245.358	311.782	550.763				190.62	25.5883	97.5656	43.0068	119.528	97.17	108.855	1A,Md	IMON 1.66			chesapeake bay	USA
SALE_M#34	SALE	M	608174	605.271	322.335	656691	612.709	342.979	152.781	150.981	183.674	177.802	176.577	181.589		310.734	254.467	279.799	537.488	238.246	304.726	543.838		78839.2			26.9013	93.8339	38.4203	113.736	92.8877	103.927		IMON 1.66			chesapeake bay	USA
SALE_M#36	SALE	M	647362	627.793	330.913	690365	632.862	349.281	154.356	156.087	184.683	192.236	190.234		323.673	319.944	252.511	306.954	556.339	253.86	323.014	559.723	81824.7	85567.3	183.664	194.169	25.8862	101.184	37.8229	117.702	99.6993	106.947		IMON 1.66			chesapeake bay	USA
SALE_M#37	SALE	M	644597	623.463	331.493	699324	632.164	353.96	157.779	151.221	190.471	190.103	189.812	191.306	327.56	324.478	243.424	298.877	546.796	252.599	302.937	558.364	78940.2	79820.7	173.87	185.632	26.6137	98.582			98.1206	105.217		IMON 1.66			chesapeake bay	USA
SALE_M#38	SALE	M	625929	608.582	329.642					155.853	186.996	191.317	175.832	176.384	305.99		240.975	306.17	570.918	252.816	312.29	579.047			175.145	196.098	24.9976	97.5233	35.0351	113.922	95.4636	104.093	Md	IMON 1.66			chesapeake bay	USA
SALE_M#40	SALE	M	690098	650.791	340.307	740637	656.189	361.683	160.23	160.253	194.123	187.009	195.134				260.058	335.611	594.078	255.147	318.774	572.874	95525.1	92537.9	186.544	197.045	29.0158	100.623			98.8688			IMON 0.13			chesapeake bay	USA
SALE_M#41	SALE	M	654563	625.438	334.984	695387	630.338	352.848	151.51	158.516	193.342	195.605	189.935	193.325		326.457	256.48	312.43	547.932	273.889	293.175	554.491	83191.7	83279.7	186.658	193.19	25.7459	101.68	41.012	121.692	100.779	109.696		IMON 0.13			chesapeake bay	USA
SALE_M#42	SALE	M	677475	637.248	340.81	719939	642.28	358.496	156.189	158.414	196.71	191.683	188.641	191.328		322.74	255.546	305.017	557.66	239.862	301.449	535.321	86728.2	82777.5	185.776	203.887	26.6137	101.752	39.686	124.812	100.386	113.205		IMON 0.13			chesapeake bay	USA
SALE_M#43	SALE	M	645361	619.135	333.77				152.088	156.206	184.918	180.21	190.901	187.813			249.262	316.631	559	236.482	300.424	537.599	88537.6	86972.5	191.4	183.118	25.9317	93.5243	42.4706	115.467	92.6791	107.788		IMON 0.13			chesapeake bay	USA
SALE_M#44	SALE	M	656749	632.382	332.943	697029	634.221	351.762	153.247	156.84	196.382	192.529	187.258	186.611	316.948		253.802	307.921	568.439	248.504	311.023	567.454	80171.1	85774.3	180.389	196.566		98.4799	40.5962	118.855	95.2932	107.626		IMON 0.13			chesapeake bay	USA
SALE_M#46	SALE	M	610551	599.66	326.082	659441	606.893	347.365	155.902	154.571	187.382	190.813	173.804	182.303		309.019	242.04	305.896	546.124	233.678	310.945	572.396			186.498	180.885	28.2547	102.855	43.4047	115.699	99.2337	106.572		IMON 1.66			chesapeake bay	USA
SALE_M#47	SALE	M				687446	627.615	350.394	156.421	157.249	195.391	196.099	187.009	184.453		321.656			555.921	244.089	316.918	567.062					28.5828	100.497	43.9838	120.488	99.3335	110.425		IMON 1.66			chesapeake bay	USA
TORO_M#01	TORO	M	470205	544.571	279.136	510621	552.096	296.9	133.617	136.078	158.54	160.568	168.016	166.271	284.413	282.637	197.622	280.061	501.978	211.986	270.103	502.159	24564.9	27537.3	133.161	146.679	24.681	97.1493	28.8722	95.2673	95.3653	82.9249		UK		2015-Jul-13	Pegwel Bay, Kent, UK	UK
TORO_M#02	TORO	M	476964	555.133	278.253	506460	555.353	292.73	139.677	134.738	168.016	163.932	175.251	168.44	305.708		204.063	291.819	517.333	199.197	286.731	499.707		24403.6		134.1	23.8005	96.4242	32.1177	102.853	94.784	86.731		UK		2015-Jul-13	Pegwel Bay, Kent, UK	UK
TORO_M#03	TORO	M	456234	533.079	277.445	506364	558.09	291.268	132.912	136.662	162.584	163.658	167.947	171.77	290.436		199.9	284.244	498.761	218.624	280.651	505.398	24625	27684.8	139.274	151.338	23.5395	100.747	32.5114	103.215	96.2191	88.7624		UK		2015-Jul-13	Pegwel Bay, Kent, UK	UK
TORO_M#04	TORO	M	456031	544.21	271.487	497055	556.802	286.986	132.699	126.558	165.513	163.393	173.5	171.128	292.194		202.427	280.664	487.505	207.178	282.13	495.021	25606.1	27856.4	139.495	144.426	25.3756	104.506	32.7583	103.144	103.006	90.4347		UK		2015-Jul-13	Pegwel Bay, Kent, UK	UK
TORO_M#05	TORO	M	455368	539.097	274.007	485265	543.409	286.729	135.612	135.367	167.194	163.223	175.195	165.841	288.929	290.9	196.594	282.368	493.615	204.422	284.765	504.425	27077.9	29148.2	134.585	136.167	24.1414	98.1492	30.7781	98.1782	96.6021	85.6072		UK		2015-Jul-13	Pegwel Bay, Kent, UK	UK
TORO_M#06	TORO	M	436618	527.231	267.872	473110	538.187	282.418	138.561	135.785	164.27	166.225	159.35	163.262	290.274	278.969	197.623	271.269	499.148	200.572	279.123	514.325	23499.6	24780.6	135.555	140.863	24.1345	97.2431	34.7962	85.3094	95.3695	75.5302		UK		2015-Jul-13	Pegwel Bay, Kent, UK	UK
TORO_M#07	TORO	M	462468	543.822	275.663	499690	553.367	290.221	136.28	134.46	166.295	166.988	170.087	169.92	300.157		198.882	285.825	491.994	202.134	284.056	494.862	25215.2	27164.2	144.07	142.265	25.6409	98.3798	31.5993	99.4693	96.4086	85.5567	1A,2A	UK		2015-Jul-13	Pegwel Bay, Kent, UK	UK
TORO_M#08	TORO	M	435614	519.814	270.766	470561	530.641	284.289	129.502	134.403	159.936	158.266	163.021	161.223	283.139	288.238	199.01	259.129	476.958	185.14	272.594	484.318	23674.6	26789.7	140.003	132.709	23.3959	92.2519	30.8592	93.5395	91.1193	83.2845		UK		2015-Jul-13	Pegwel Bay, Kent, UK	UK
TORO_M#09	TORO	M	432797	526.576	265.534	469718	533.313	282.863	134.065	132.188	164.958	160.291	164.561	160.324		276.623	203.894	265.852	469.955	201.079	281.435	489.095	23900.5	27075.7	135.025	141.301	23.8912	96.7642	31.4067	98.1767	95.0878	86.3646		UK		2015-Jul-13	Pegwel Bay, Kent, UK	UK
TORO_M#10	TORO	M	436014	524.17	269.217	465711	528.442	282.872	135.363	129.85	163.564	162.017	164.048	157.888	284.504	280.034	196.483	265.515	477.899	200.687	271.396	484.637	23954.5	26675.7	136.711	139.494	24.781	94.2661	29.2539	94.6722	92.6479	81.9876		UK		2015-Jul-13	Pegwel Bay, Kent, UK	UK
TORO_M#11	TORO	M	446877	535.498	270.612	482662	544.48	284.705	133.003	131.64	161.128	159.052	168.886	166.061	294.117		195.023	276.999	485.784	202.267	283.393	495.905	24480.2	28008.6		135.347	23.5788	98.236	30.2359	101.143	96.7695	87.0887		UK		2015-Jul-13	Pegwel Bay, Kent, UK	UK
TORO_M#12	TORO	M	463758	544.774	275.575	499179	552.578	290.277	136.321	133.739	163.097	161.896	169.215	165.514	282.147	290.537	197.893	279.777	501.219	201.346	284.615	513.526	25215.3	27529.7	130.036	140.975	25.4816	101.932	32.7197	101.24	99.7711	87.6544		UK		2015-Jul-13	Pegwel Bay, Kent, UK	UK
TORO_M#13	TORO	M	459919	540.399	275.286	490882	546.912	288.234	136.212	132.672	167.452	160.906	166.123	163.238	292.436		193.109	264.711	483.592	187.479	272.178	476.316	24198.3	27712.8	131.807	134.437	22.5798	93.6618	28.3153	98.3148	91.8818	84.7271		UK		2015-Jul-13	Pegwel Bay, Kent, UK	UK
TORO_M#14	TORO	M	450633	533.839	273.424	484271	539.882	287.921	136.316	133.707	163.847	163.64	170.351	165.466	286.781		195.21	274.035	492.739	199.295	288.023	505.46	24970.3	26425.9	139.488	134.624	24.9301	100.856	31.649	106.003	98.954	89.9464		UK		2015-Jul-13	Pegwel Bay, Kent, UK	UK
TORO_M#15	TORO	M	465410	542.388	277.82	495258	548.249	290.024	133.315	134.444	170.684	167.73	165.622	161.668	302.923		197.877	287.467	497.837	201.95	289.14	499.872	25857.6	27604.1	144.822	143.379	24.8895	99.2078	32.5726	99.4913	97.6975	88.4124		UK		2015-Jul-13	Pegwel Bay, Kent, UK	UK
TORO_M#16	TORO	M	486034	552.447	283.88	525957	563.452	299.463	140.056	138.678	164.049	160.821	170.613	162.269			202.727	275.607	514.409	199.763	276.141	509.803	25417.6	28595.7	127.478		24.2482	95.998	30.5886	96.1653	94.8133	85.9343		UK		2015-Jul-13	Pegwel Bay, Kent, UK	UK
TORO_M#17	TORO	M	436454	526.156	268.87	475168	534.98	285.18	130.361	131.338	157.621	156.98	174.491		276.588	277.805	183.273	249.957	491.198	183.593	259.927	487.713	23566.8	24309.2	137.38	138.501	23.0671	94.1147	28.6221	97.1394	92.936	86.8549		UK		2015-Jul-13	Pegwel Bay, Kent, UK	UK
TORO_M#18	TORO	M	428026	518.495	266.614	465783	527.834	283.38	133.034	131.28	164.687	160.452	161.478	163.439	275.151	277.196	193.083	265.487	488.402	181.76	269.046	480.799	22934.6	25307.2	136.196	140.881			28.3312	90.6592		73.8456	3WL	UK		2015-Jul-13	Pegwel Bay, Kent, UK	UK
TORO_M#19	TORO	M	417558	515.051	262.126	449963	520.665	277.652	128.244	125.265	169.589	169.998	163.329		299.757		184.296	265.668	472.394	185.225	263.737	471.537	22456.2	23880.2	132.436	125.192	22.6245	90.1869	28.4558	91.5177	89.382	83.0982	1A,2A	UK		2015-Jul-13	Pegwel Bay, Kent, UK	UK
TORO_M#20	TORO	M	496712	563.011	285.814	540305	572.128	303.349	140.772	139.565	166.763	167.532	179.516	174.715			210.838	282.52	518.759	219.242	277.047	535.691	25056	27732.4	140.533	139.613	26.0538	96.6496	29.3392	100.578	95.5862	89.0174		UK		2015-Jul-13	Pegwel Bay, Kent, UK	UK
TORO_M#21	TORO	M	449539	532.112	273.757	484943	540.233	287.782	129.381	128.799	157.992	160.72	166.929	163.238	282.279		189.522	265.179	479.591	195.471	279.899	489.663	27256.3	27478.4	134.053	141.964	19.2788	93.2239			92.8015			UK		2015-Jul-13	Pegwel Bay, Kent, UK	UK
TORO_M#22	TORO	M	425980	518.152	265.739	452588	525.858	276.471	132.725	133.891	159.999	160.715	162.926	159.755	283.834	281.668	184.626	264.808	483.668	198.442	267.64	488.555	26125.5	26151.3	139.904	142.166	22.8124	96.8376	29.251	94.2414	96.0119	82.3373		UK		2015-Jul-13	Pegwel Bay, Kent, UK	UK
TORO_M#23	TORO	M	482830	548.437	284.064	520208	557.532	299.263	137.133	137.588	169.095	166.895	173.346	168.656	299.443	296.433	202.93	284.987	498.283	215.489	287.828	511.551	27995.5	28587.5	141.21	144.974	25.9285	100.217	30.0626	103.076	99.0663	89.2581		UK		2015-Jul-13	Pegwel Bay, Kent, UK	UK
TORO_M#24	TORO	M	453234	528.307	278.02	492808	542.642	291.651	134.002	136.513	168.274	163.283	174.886	167.971	289.757		198.533	278.94	489.511	204.022	279.408	507.597	26659.6	27669.8	134.981	135.866	20.7913	95.1651	25.6497	84.1815	94.8403	78.7543		UK		2015-Jul-13	Pegwel Bay, Kent, UK	UK
TORO_M#25	TORO	M	447918	534.794	271.624	485338	544.01	286.591	137.483	140.155	163.95	170.512		165.719			197.945	284.148	502.749	208.57	286.973	513.911	25384.6	26967.7	141.243	139.106			30.3036	99.817		85.3733		UK		2015-Jul-13	Pegwel Bay, Kent, UK	UK
TORO_M#26	TORO	M	437676	526.553	268.159	475303	538.268	283.502	133.492	135.216	162.63	163.188	162.186	162.931	300.947	291.248	197.209	284.002	503.299	200.439	280.943	503.006	25534.5	26283.9	134.632	138.248	24.5532	99.3412	32.0266	102.862	97.6845	86.1703		UK		2015-Jul-13	Pegwel Bay, Kent, UK	UK
TORO_M#27	TORO	M	450826	530.245	275.547	483885	538.336	288.414	135.521	131.453	160.134	164.119	170.939	169.92	286.753	289.121	202.986	277.621	485.056	201.03	274.959	484.757	26168.4	24777.6	138.177	130.784	26.0765	98.967	31.5815	97.3226	97.5853	85.7488		UK		2015-Jul-13	Pegwel Bay, Kent, UK	UK
TORO_M#28	TORO	M				505996	551.853	294.37	139.162	136.038	164.079	163.723	169.691	159.528	300.871	294.687	195.533	269.291	501.144	193.675	284.536	500.549	26167.4	26955.5	138.132	132.077			30.3508	96.9527		85.9108		UK		2015-Jul-13	Pegwel Bay, Kent, UK	UK
TORO_M#29	TORO	M	499923	562.102	288.367	535122	573.608	299.975	137.58	132.41	170.769	168.846		169.844	300.362	291.052	201.606	282.707	512.883	211.524	292.317	520.73	27773	27694.8	140.753	140.725	25.759	103.402	33.2316	106.463	102.06	91.9807		UK		2015-Jul-13	Pegwel Bay, Kent, UK	UK
TORO_M#30	TORO	M	395953	501.537	254.853	428266	511.103	269.201	125.265	125.443	156.484	160.447	156.814	156.574	277.248		182.754	254.451	453.844	183.493	266.208	465.401	23798.1	24449.8	121.548	129.078	22.9902	92.5175	29.9371	89.3681	91.1295	79.1569		UK		2015-Jul-13	Pegwel Bay, Kent, UK	UK
TORO_M#31	TORO	M	422871	511.889	267.338	457958	523.477	280.622	128.158	127.533	163.11	156.87	164.326	163.09		265.882	188.94	270.065	464.269	193.187	278.791	477.648	24495.4	27149.4	132.646	136.447	25.1767	93.7998	31.1725	93.3233	92.6164	82.5458		UK		2015-Jul-13	Pegwel Bay, Kent, UK	UK
TORO_M#32	TORO	M	442375	530.685	269.449	475311	538.457	283.49	134.501	134.408	158.184	153.685	167.764	157.992	287.743	284.195	191.702	274.555	498.243	194.326	281.123	503.038	25315.5	28577.1	138.12	138.515	22.2641	98.4403	30.901	100.612	96.9078	84.9337		UK		2015-Jul-13	Pegwel Bay, Kent, UK	UK
TORO_M#33	TORO	M	475347	550.377	279.558	511230	555.304	295.62	133.741	136.259	160.596	162.746	168.811	164.34	293.481	291.063	191.663	263.495	510.736	186.932	266.4	510.432	25633.3	24437.8	142.315	132.77	23.2465	92.5345	30.6491	92.7825	90.9107	82.0297		UK		2015-Jul-13	Pegwel Bay, Kent, UK	UK
TORO_M#34	TORO	M	425829	522.46	263.645	461326	532.439	278.373	129.374	130.408	158.145	154.658	160.272	160.648	278.656		209.963	250.506	478.144	189.652	267.286	484.677	24838.5	25200.7	134.891	133.383	22.9927	95.7782	32.2189	98.4434	94.1197	85.7246		UK		2015-Jul-13	Pegwel Bay, Kent, UK	UK
TORO_M#35	TORO	M	429294	516.196	269.03	460716	525.613	281.655	131.556	130.155	155.287	156.499	166.625	163.425	286.823	282.761	191.273	270.893	478.793	197.442	269.565	476.081	23841.5	25817.4	128.284	136.432	23.5395	96.3736	30.8646	94.5418	94.1824	82.9503		UK		2015-Jul-13	Pegwel Bay, Kent, UK	UK
TORO_M#36	TORO	M	429018	521.293	266.053	463363	529.011	281.166	130.078	127.116	161.044	155.808	172.692	169.751	290.995	286.58	197.883	265.268	486.51	195.038	280.102	493.35	26219.5	26491.9	134.637	134.032	25.056	97.0805	31.57	96.0688	95.0609	84.3151		UK		2015-Jul-13	Pegwel Bay, Kent, UK	UK
TORO_M#37	TORO	M	461227	534.761	277.004	493051	546.736	289.584	134.82	133.86	162.4	158.397	159.755	151.502	294.251		191.67	271.834	470.631	200.724	275.165	480.59	24311	26276.3	139.555	132.007	25.3357	95.9137			94.2286			UK		2015-Jul-13	Pegwel Bay, Kent, UK	UK
TORO_M#38	TORO	M	513568	570.688	290.955	548240	580.392	303.676	137.58	137.673	170.345	171.321	174.669	177.154	299.029	296.274	208.485	296.354	518.794	210.295	284.393	500.001	28730.6		140.892	130.996	24.9582	98.8455	32.6149	104.348	97.2639	90.9222		UK		2015-Jul-13	Pegwel Bay, Kent, UK	UK
TORO_M#39	TORO	M	466374	548.824	275.897	499563	553.172	290.246	136.419	135.506	163.042	163.356	170.181	166.959	296.87	292.948			504.291	206.037	287.045	524.392	26169.2	28171	137.414	146.724	24.4696	99.1524	31.959	107.66	96.7834	90.2758		UK		2015-Jul-13	Pegwel Bay, Kent, UK	UK
TORO_M#40	TORO	M	423272	518.474	264.472	456853	527.433	278.206	134.002	129.439	158.285		160.483	165.133	280.28		197.199	266.899	485.225	209.344	274.917	488.787	24109.2	25799.6	131.318	138.002	24.1845	99.391	31.0425	99.1691	97.2743	85.5206		UK		2015-Jul-13	Pegwel Bay, Kent, UK	UK
TORO_M#41	TORO	M	444743	529.474	272.01	472042	536.263	282.802	134.603	134.62	160.21	158.191	165.743	167.315		289.664	199.142	269.9	485.964	201.691	280.52	488.247	25156.8	27541.4	131.72	139.494	24.3199	97.0835	30.5031	98.714	96.2433	85.7226		UK		2015-Jul-13	Pegwel Bay, Kent, UK	UK
TORO_M#42	TORO	M	385321	494.938	252.58	420043	502.465	268.581	130.579	128.52	157.89	156.875		156.577	269.93		186.682	257.161	452.498	196.753	267.614	474.234	23045.1	24716.2	127.067	127.181	25.5971	94.5703	32.3546	94.7505	93.5337	82.9666		UK		2015-Jul-13	Pegwel Bay, Kent, UK	UK
TORO_M#43	TORO	M	447222	531.163	272.58	481207	539.42	286.417	136.494	133.67	162.405	165.683	162.938	167.436	291.732		201.855	273.631	509.135	207.6	275.663	512.995	25356.8	27275.2	141.397	142.674	24.124	94.7907	29.5348	93.7435	92.8514	84.1514		UK		2015-Jul-13	Pegwel Bay, Kent, UK	UK
TORO_M#44	TORO	M				464479	531.672	280.339	133.845	132.259	166.139	163.534	170.239	164.922	283.844	286.794	191.735	260.649	489.327	198.482	271.755	500.235	23022.5	25802	134.183	139.691	24.3384	94.7204	31.4862	93.3994	93.9073	83.5737		UK		2015-Jul-13	Pegwel Bay, Kent, UK	UK
TORO_M#45	TORO	M	458376	535.633	276.565	486662	541.768	288.717	135.257	131.902	168.001	165.602	169.219	159.641	289.593		200.66	278.368	503.553	196.099	280.943	503.311		27799.6	137.471	135.935	23.4139	89.4452			86.8734			UK		2015-Jul-13	Pegwel Bay, Kent, UK	UK
TORO_M#46	TORO	M	425758	519.985	265.18	451329	527.032	275.32	132.749	129.792	162.945	159.028	167.35	165.385	286.937	283.755	191.216	261.596	456.433	198.471	269.59	467.88	24814.6	24437	134.919	147.408	22.1313	95.6283	30.8428	95.9755	94.5971	83.8836		UK		2015-Jul-13	Pegwel Bay, Kent, UK	UK
TORO_M#47	TORO	M	473223	547.022	278.988	512271	559.429	294.353	131.376	130.666	164.335	165.796	175.376	168.213	293.319		207.671	290.364	505.685	213.719	292.63	503.987	27246.4	30539.9	141.734	143.007	24.434	98.6011	32.7755	104.457	97.4413	89.7858		UK		2015-Jul-13	Pegwel Bay, Kent, UK	UK
TORO_F#a	TORO	F	427921	496.951	278.654	476692	520.436	293.432	133.76	133.764	157.608	155.487	164.735	163.056													21.1886	77.6758	19.9826	74.1092	76.86	73.9368		UK		2015-Jul-13	Pegwel Bay, Kent, UK	UK
TORO_F#b	TORO	F	400135	479.941	269.058	435916	492.522	283.577	129.85	129.544	154.051	158.081	158.072	159.56	279.26	273.566											20.4164	72.8908	21.8156	73.9958	72.7092	73.4796		UK		2015-Jul-13	Pegwel Bay, Kent, UK	UK
TORO_F#c	TORO	F	394486	474.464	268.029	430488	487.348	283.11	129.935	125.223	159.108	159.27	161.974	158.489	278.808												20.1951	76.4601	20.8142	77.4814	76.1726	77.0964		UK		2015-Jul-13	Pegwel Bay, Kent, UK	UK
TORO_F#d	TORO	F	403968	480.79	270.762	448191	497.551	288.71	130.92	125.034	160.132	158.029	163.172	156.025	289.64	280.57											21.2112	75.8409	19.7948	77.6498	75.4781	76.8436		UK		2015-Jul-13	Pegwel Bay, Kent, UK	UK
TORO_F#e	TORO	F	416235	487.451	276.379	454325	499.301	291.498	133.91	130.622	157.733	152.314	157.179	158.79	283.58												22.283	80.9456	22.5648	81.1255	80.4656	80.1831		UK		2015-Jul-13	Pegwel Bay, Kent, UK	UK
TORO_F#f	TORO	F	446072	512.045	281.18	479882	520.822	295.802	134.844	133.981	161.875	162.27	165.237	166.65		279.762											21.7524	75.1396	21.3892	81.7269	74.4531	80.9285		UK		2015-Jul-13	Pegwel Bay, Kent, UK	UK
TORO_F#g	TORO	F	428877	496.508	278.644	469066	506.866	296.659	135.552	132.471	158.296	156.628	156.821	158.447	291.729	282.733											22.896	72.8114	21.0383	75.4417	71.861	75.0317	1WL	UK		2015-Jul-13	Pegwel Bay, Kent, UK	UK
TORO_F#h	TORO	F	405207	485.426	269.813	447950	498.505	287.862	128.177	122.387	155.108	151.401	155.592	155.235	275.468	277.145											21.8104	74.6535	21.3879	77.4771	73.9064	76.9342	1WL	UK		2015-Jul-13	Pegwel Bay, Kent, UK	UK
TORO_F#i	TORO	F	390385	476.819	264.654	424501	488.516	278.696	128.553	127.599	157.946	152.626	156.105	151.009	270.089	275.346											18.486	70.7447	20.5439	72.2043	70.3702	71.4566		UK		2015-Jul-13	Pegwel Bay, Kent, UK	UK
TORO_F#j	TORO	F	474190	517.973	294.735	514959	534.619	308.748	134.423	135.025	167.435	158.068	162.882	157.22		291.32											23.1351	78.6698	21.0943	80.1065	78.1123	79.2406		UK		2015-Jul-13	Pegwel Bay, Kent, UK	UK
TORO_F#k	TORO	F	482766	522.044	298.504	524655	539.088	311.901	137.758	134.733	167.682	162.91	167.053	163.884		293.739											23.4295	81.4327	22.8309	84.036	80.6584	82.8094		UK		2015-Jul-13	Pegwel Bay, Kent, UK	UK
TORO_F#L	TORO	F	427756	494.977	277.923	463935	507.321	292.834	129.957	132.963	157.364	159.468	160.506	154.706	284.752	280.763											23.439	81.4699	21.2244	77.5609	80.1305	76.2334		UK		2015-Jul-13	Pegwel Bay, Kent, UK	UK
TORO_F#M	TORO	F	478734	524.009	293.471	523615	541.488	310.025	142.027	139.987	169.455	168.454	174.925	175.951	292.578	282.554											22.1338	83.9323	22.1313	82.9415	83.063	82.0534		UK		2015-Jul-13	Pegwel Bay, Kent, UK	UK
TORO_F#N	TORO	F	426403	490.819	279.916	464918	504.31	295.192	129.962	124.8	158.173	153.578	158.938	164.507															21.5188	79.0557		78.7001		UK		2015-Jul-13	Pegwel Bay, Kent, UK	UK
TORO_F#O	TORO	F	434802	495.324	281.943	479892	513.468	299.365	129.968	128.357	160.308	159.456	164.194	164.97		292.135											21.3208	82.2113	20.0276	82.6763	81.6141	81.9383	1WL,2WL,3WL	UK		2015-Jul-13	Pegwel Bay, Kent, UK	UK
TORO_F#P	TORO	F	405186	480.198	271.957	441011	489.832	288.429	126.884	126.501	151.471	154.584	159.642	153.743	283.904	276.416											21.3629	76.9599	21.8349	73.8555	76.5954	73.3081		UK		2015-Jul-13	Pegwel Bay, Kent, UK	UK
TORO_F#Q	TORO	F	417653	494.907	272.728	454796	507.035	287.345	131.934	127.585	165.71		162.59	160.763	282.165	276.252											21.3366	77.8534	22.4062	75.5388	77.1769	74.6704		UK		2015-Jul-13	Pegwel Bay, Kent, UK	UK
TORO_F#R	TORO	F	408826	477.379	275.269	445508	491.697	290.09	132.558	125.499	152.89	155.604	159.004	159.203	277.907												20.1003	72.8423	21.5891	71.7721	72.5739	71.4283		UK		2015-Jul-13	Pegwel Bay, Kent, UK	UK
TORO_F#S	TORO	F	400746	478.551	269.749	438284	491.571	285.807	125.059	123.7	151.95	151.096	153.272	152.539	269.773	268.589											21.3629	69.7085	20.3875	72.1054	69.3354	71.8176		UK		2015-Jul-13	Pegwel Bay, Kent, UK	UK
TORO_F#T	TORO	F	387583	472.794	263.042	428313	492.133	279.047	129.694	129.302	151.51	154.012	155.211	152.104		266.165											21.061	71.9126	19.5808	73.982	71.5744	73.4184		UK		2015-Jul-13	Pegwel Bay, Kent, UK	UK
